# Supplementary material
Source: publisher site journal article supplement (https://www.dovepress.com/article/470963)
Supplement: Supplementary file 1 [file get_supplementary_file.php]

Supplementary materials

table1 inclusion and exclusion criteria

| **groups** | **criteria** |
| --- | --- |
| **Inclusion criteria** |  |
| ATB | 1. Age≥18 years old; and 2. Mtb culture or/and acid-fast staining or/and Xpert Mtb/RIF or/and Mtb nucleic acid positive; and 3. Clinical manifestations of ATB (fever, cough, night sweats or weight loss, etc.); and   No antituberculosis therapy or antituberculosis therapy within 2 weeks. |
| Fever | 1. Age≥16 years old; and 2. Fever＞38.5℃; and 3. IGRAs negative; and 4. Imaging without evidence of active TB and previous history of TB 5. Other diseases were diagnosed and responded to treatment. |
| LTBI | 1. Age≥16 years old; and 2. No clinical manifestations of ATB (fever, cough, night sweats or weight loss, etc.); and 3. IGRAs positive; and 4. Other diseases were diagnosed and responded to treatment. |
| HC | 1. Age≥16 years old; and 2. No clinical manifestations of ATB (fever, cough, night sweats or weight loss, etc.); and 3. IGRAs negative; and 4. NO other diseases were diagnosed. |
| **Exclusion criteria** | 1. HIV-infected people; 2. Pregnant or lactating patients; 3. Malignant tumors of the hematologic system 4. Other diseases that can cause an inflammatory response. |

**Figures**


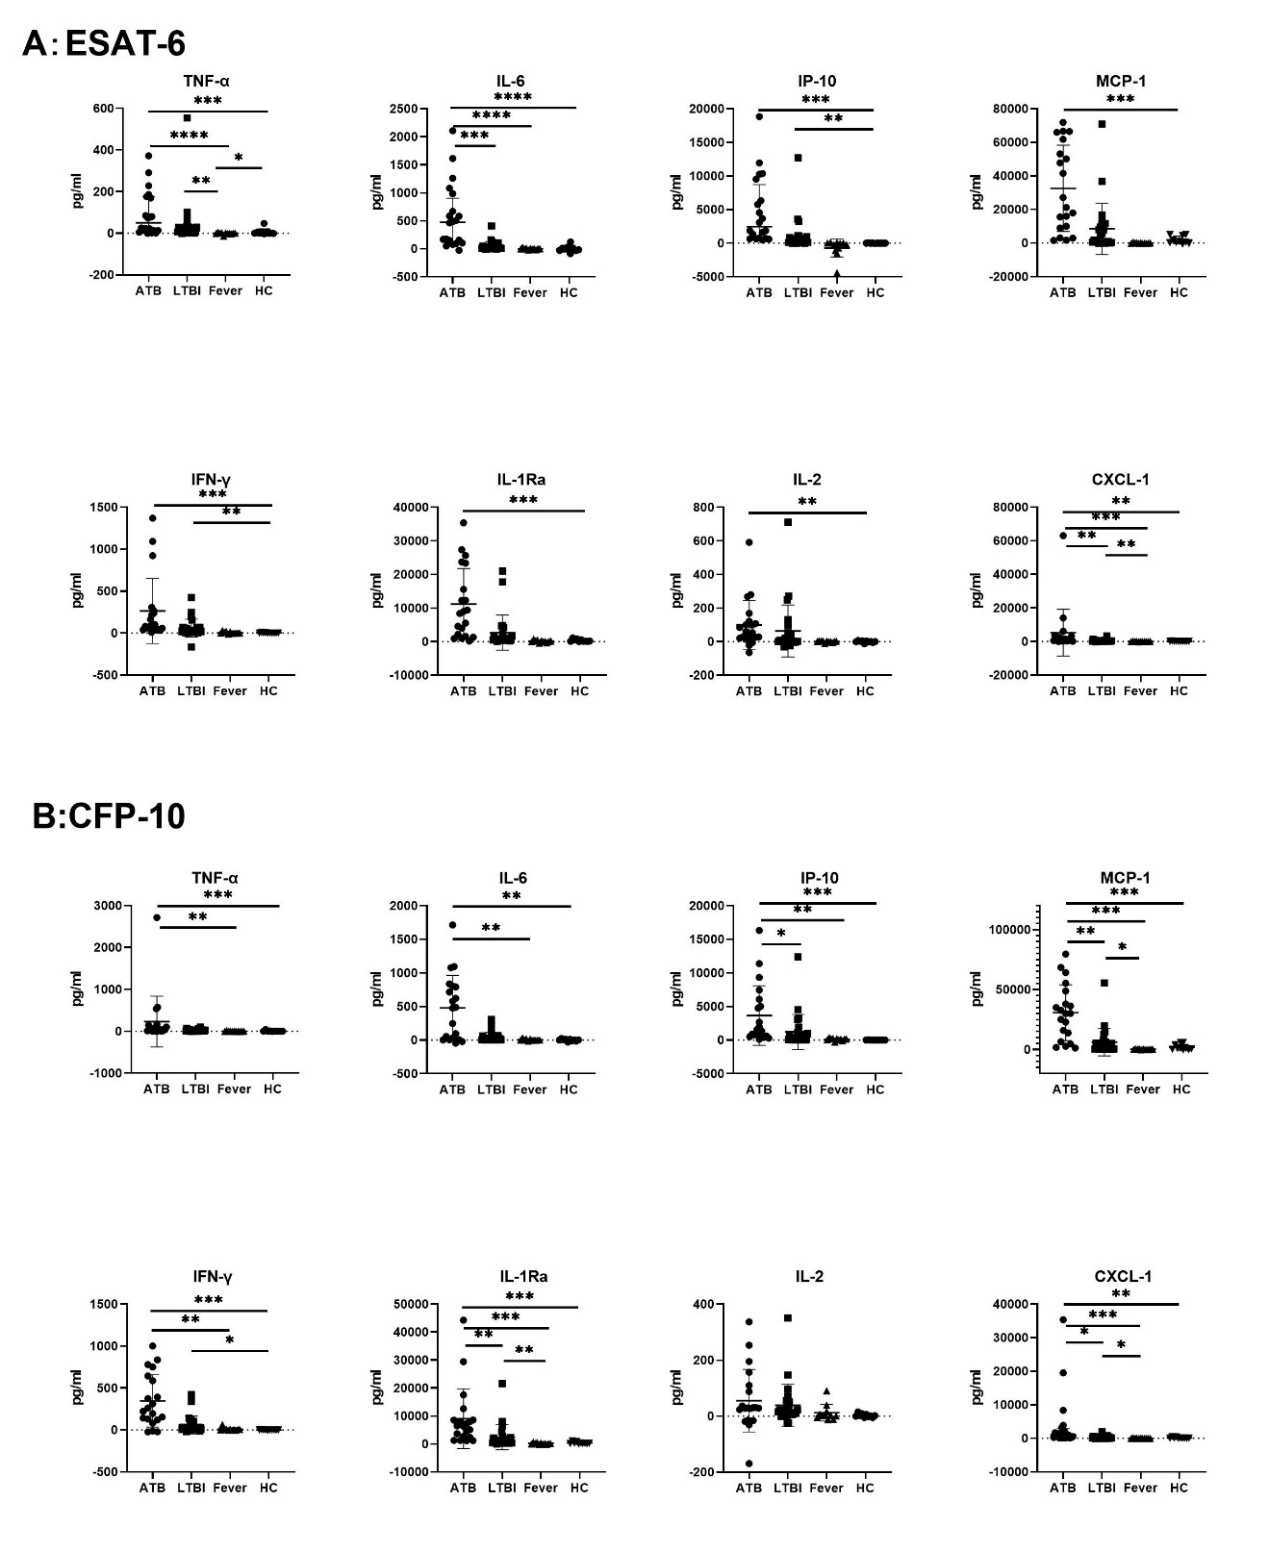


Figure 1 Cytokine/chemokines secretion in four groups with stimulation by ESAT-6 (A) and CFP-10 (B). (*: *p* < 0.05, **: *p* < 0.01, ***: *p* < 0.001)


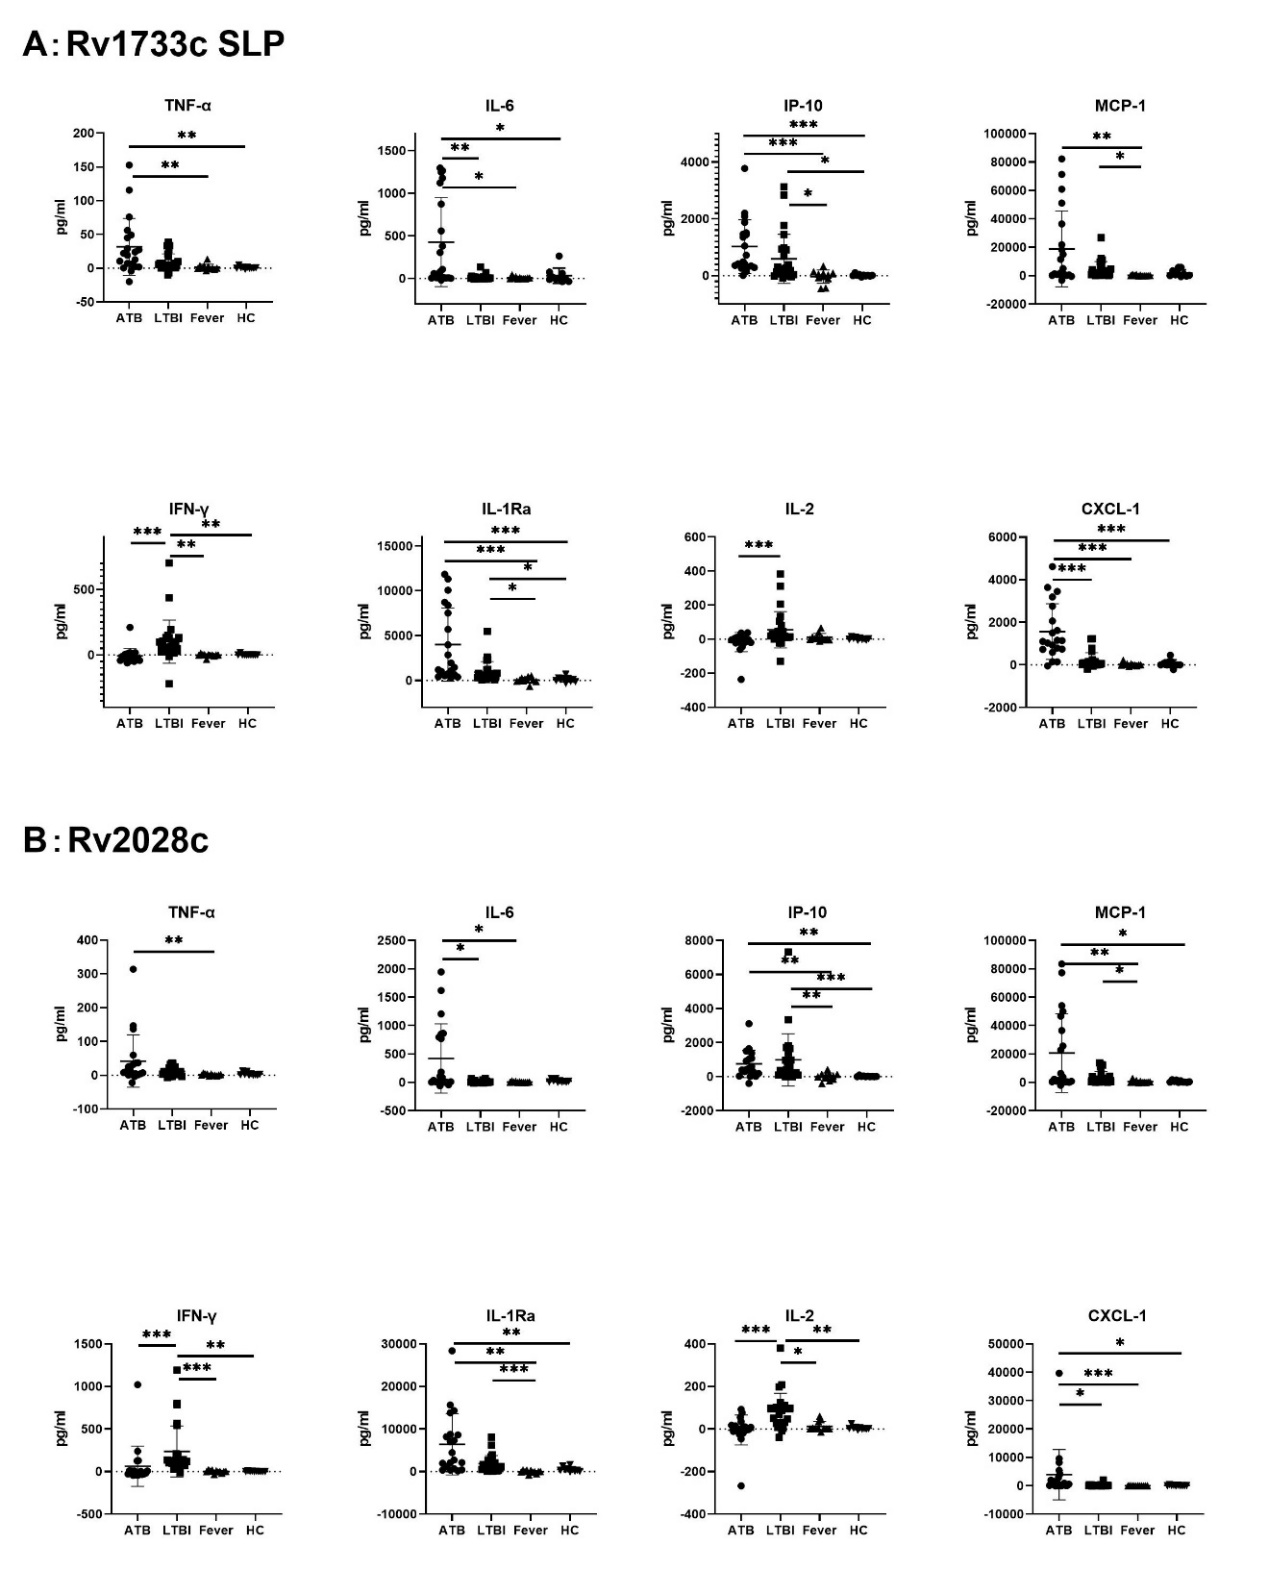


Figure 2 Cytokine/chemokines secretion in four groups with stimulation by Rv1733c SLP Antigen(A) and Rv2028c Antigen(B). (*: *p* < 0.05, **: *p* < 0.01, ***: *p* < 0.001)


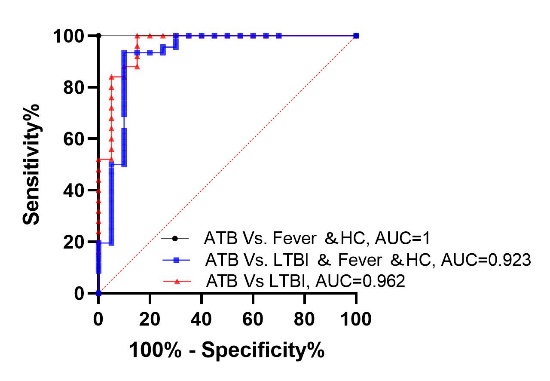


Figure 3 The diagnostic efficacy of tuberculosis-specific IFN-γ secretion for different tuberculosis infection states
